# Supplementary material for: Topoisomerase I is an evolutionarily conserved key regulator for satellite DNA transcription
Source: PubMed Central journal article supplement (PMC11183047; doi:10.1038/s41467-024-49567-5), 2024-06-17
Supplement: 41467_2024_49567_MOESM1_ESM.pdf [file 41467_2024_49567_MOESM1_ESM.pdf]

## **SUPPLEMENTARY INFORMATION**

### **Topoisomerase I is an Evolutionarily Conserved Key Regulator for Satellite DNA Transcription**

Zhen Teng<sup>1,5</sup>, Lu Yang<sup>1,5</sup>, Qian Zhang<sup>1,5</sup>, Yujue Chen<sup>1</sup>, Xianfeng Wang<sup>1</sup>, Yiran Zheng<sup>1</sup>, Aiguo Tian<sup>1,2,3</sup>, Di Tian<sup>4</sup>, Zhen Lin<sup>2,4</sup>, Wu-Min Deng<sup>1,2</sup>, and Hong Liu<sup>1,2,3</sup> \*

\* Correspondence, all inquiries should be addressed to: [hliu22@tulane.edu](mailto:hliu22@tulane.edu)

#### ***This file includes:***

**Supplementary Figure legends 1 to 11**

**Supplementary Figures 1 to 11**

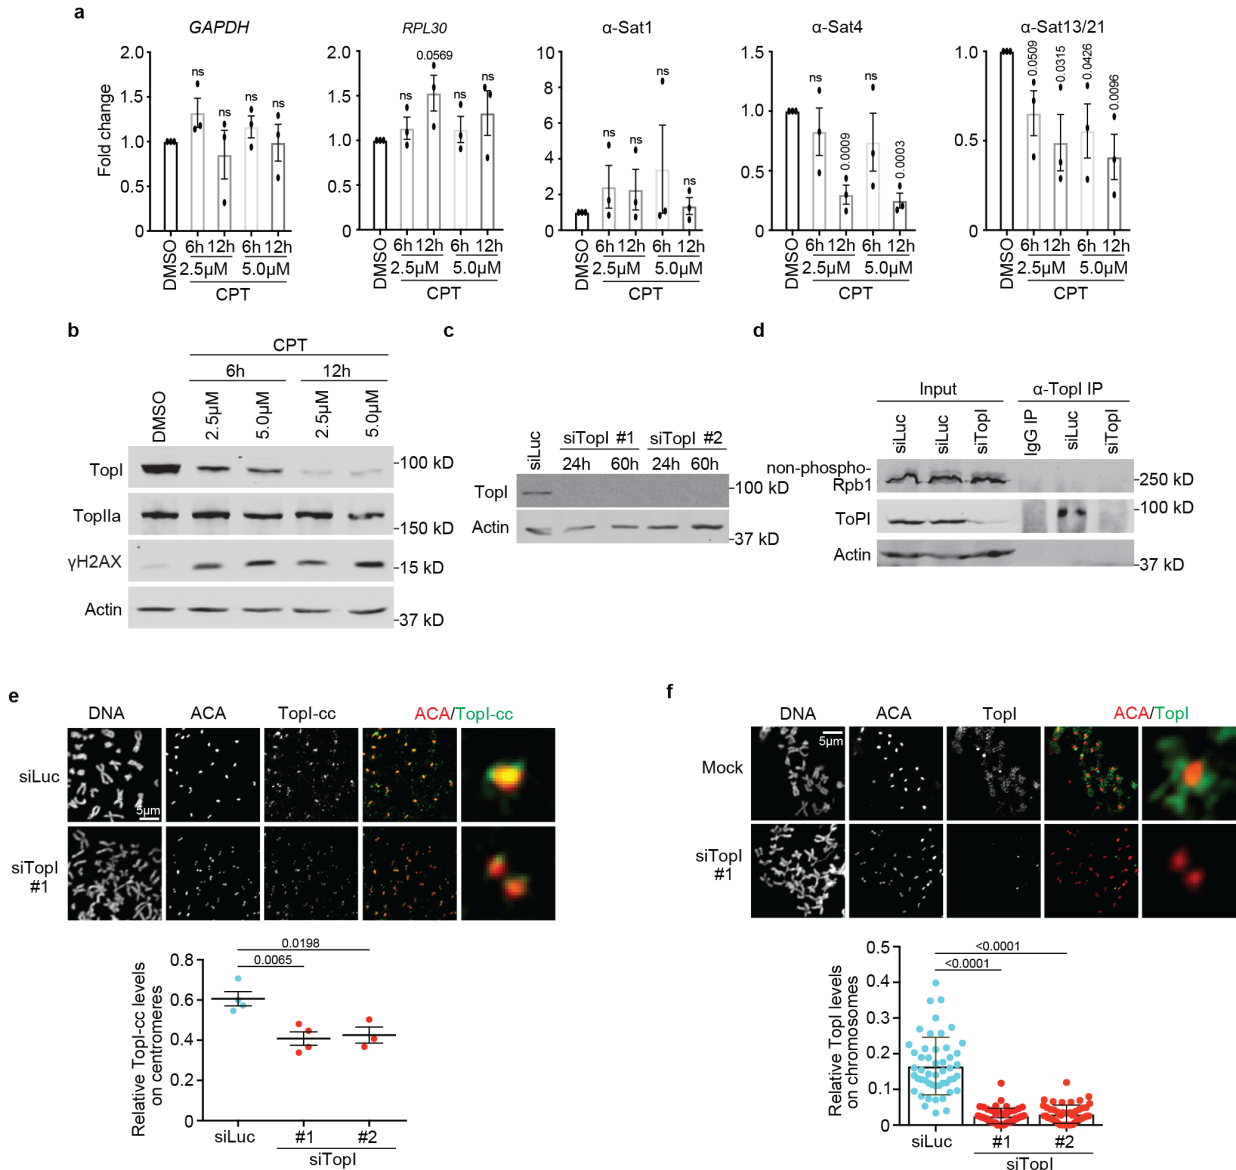

## Supplementary Fig. 1. Top1 promotes $\alpha$ -satellite transcription

**a. Top1 inhibition decreases centromeric transcription.** HeLa cells were treated with CPT (2.5  $\mu$ M) at distinct doses for 6 or 12 hrs and RNAs were extracted for real-time PCR analysis. Biological replicates n=3. Data are presented as mean values with +/- SEM. Two-sided Student's T-test. **b.** Lysates of HeLa cells in (a) were subjected to Western blotting analysis. **c. Knockdown efficiency of Top1 siRNA.** Lysates of HeLa cells transfected with luciferase or Top1 siRNAs (#1 or #2) at different timepoints were subjected to Western blotting analysis. **d. Top1 does not physically interact with non-phosphorylated RNAP II.** Lysates of HeLa cells transfected with luciferase siRNA or Top1 siRNA#1 were subjected to coimmunoprecipitation

with antibody against non-phosphorylated RNAP II (8WG16). Results for coimmunoprecipitation with antibodies against total RNAP II (4H8) and phosphorylated RNAP II (Ser2) (H5) were recorded in Fig. 2d. **e** and **f**. **Validation of Top1 and Top1-cc fluorescence signals.** HeLa cells were transfected with luciferase siRNA or Top1 siRNA#1. After a brief nocodazole (1.5 hr, 5  $\mu$ M) treatment, mitotic cells were collected for immunostaining. Quantifications of Top1-cc levels (Top1-cc/ACA, **e**) and Top1 levels (Top1/DNA, **f**) are shown in the bottom panels. Biological replicates n=4 (siLuc and #1, **e**) and n=3 (#2, **e**). For (**f**), similar results were obtained for two biological replications and quantification was performed based on a single experiment. One dot represents one chromosome. n=50 for each condition. The data here are presented as mean values +/- SEM in (**e**) and mean values +/- SD in (**f**). Two-sided Student's T-test for (**e**, **f**). For Western blots in (**b**, **c**, and **d**), similar results were obtained in at least two biological replicates. The statistical analysis in (**f**) was carried out based on a single experiment. Details of quantification and technical details in all the supplemental figures are recorded in the section of Methods. ns, not significant ( $P>0.1$ ). Numeric values for  $P<0.1$  are shown. The source data are provided in the Source Data file.

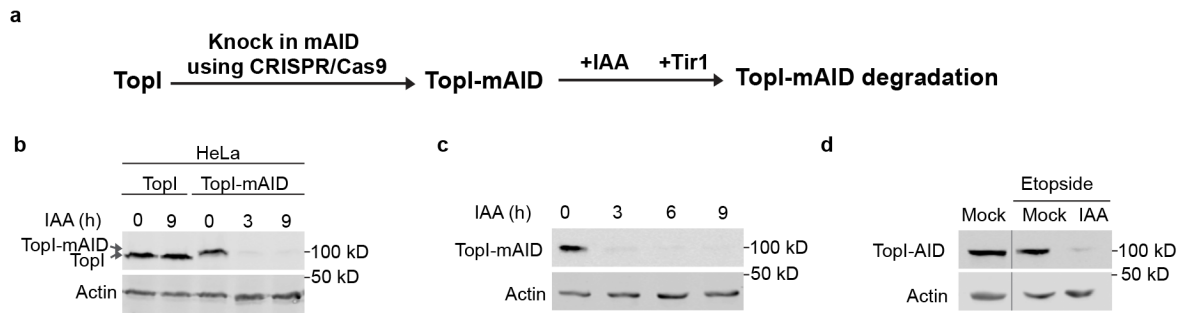

### Supplementary Fig. 2. Construction of TopI-mAID cell lines

**a.** Schematic for construction of TopI-mAID. **b.** Parent HeLa cells and Top-mAID HeLa cells were treated with IAA (1  $\mu$ M) at the indicated times. Cell lysates were analyzed by Western blotting. **c.** Top-mAID HeLa cells were treated IAA at the indicated times. Cells were collected for real-time PCR analysis (recorded in Fig. 1d) and Western blotting analysis. **d.** Top-mAID HeLa cells were treated IAA (1  $\mu$ M) and etoposide for 9 hrs. Cells were collected real-time PCR analysis (recorded in Fig. 3d) and Western blotting analysis. These blots were spliced from the same gel (Source Data file). For Western blots in (**b**, **c**, and **d**), similar results were obtained in at least two biological replicates. The source data are provided in the Source Data file.

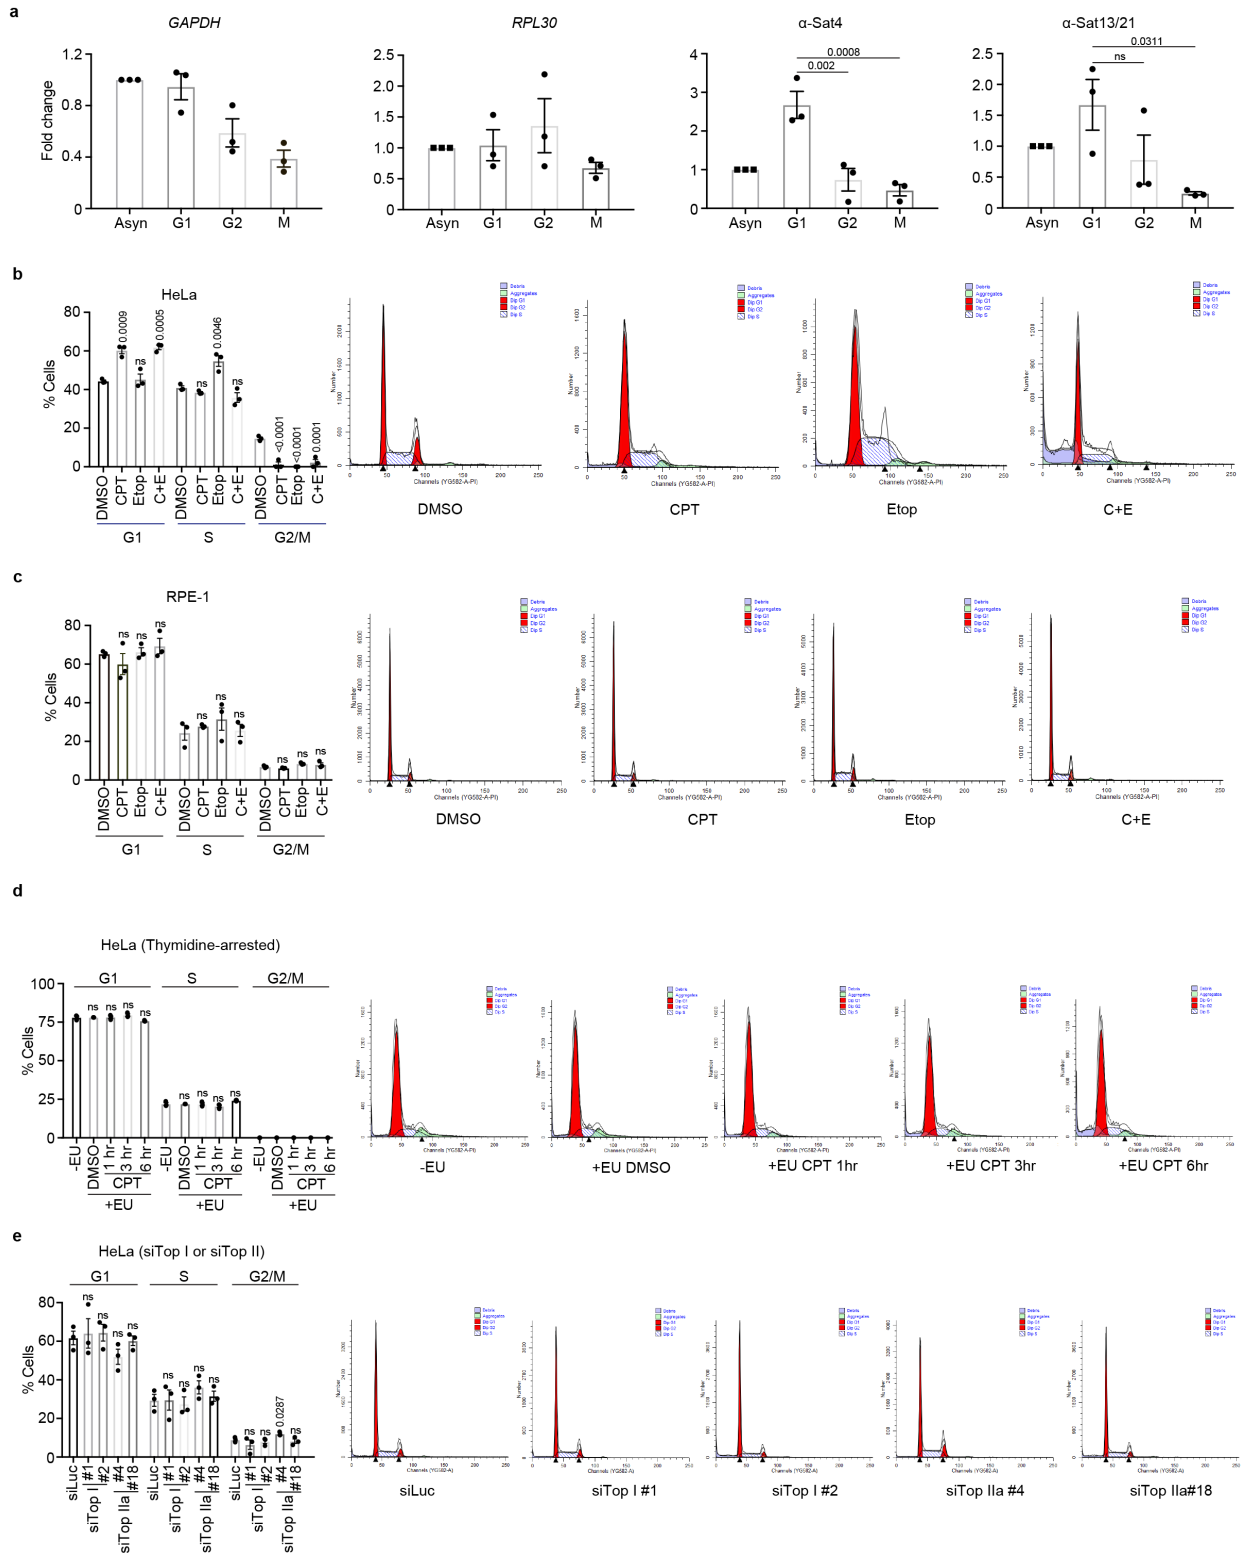

**a.  $\alpha$ -satellite transcription is cell cycle-regulated.** RNAs extracted for HeLa cells arrested with thymidine (18 hrs, G1), RO3306 (18 hrs, G2) or nocodazole (16 hrs, M), were subjected to real-time PCR analysis. Biological replicates n=3. Data are presented as mean values +/- SEM. ANOVA followed by pairwise comparisons with Turkey's test. **b and c. Flow-cytometric analyses of HeLa cells with chemical treatments.** HeLa (**b**) or RPE-1 (**c**) cells treated with DMSO, CPT (2.5  $\mu$ M), Etoposide (Etop, 30  $\mu$ M), or CPT plus Etoposide (C+E) for 12 hrs, were analyzed with FACS. Quantifications of cell cycle profiles were shown in the left panel. Biological replicates (n=3). Representatives of FACS results are shown in the right panels. Data are presented as mean values +/- SEM. ANOVA followed by pairwise comparisons with Turkey's test. **d. Flow-cytometric analyses of Thymidine-arrested HeLa cells with CPT treatment at different timepoints.** HeLa cells were incubated with thymidine for 18 hrs, during which, cells were also treated with EU and/or CPT (2.5  $\mu$ M) at different timepoints. Cells were then collected for FACS analysis. Biological replicates n=3. Data are presented as mean values +/- SEM. ANOVA followed by pairwise comparisons with Turkey's test. **e. Flow-cytometric analyses of HeLa cells transfected with TopI or TopII siRNAs.** HeLa cells transfected with luciferase, TopI or TopII siRNAs for 48 hrs, were collected for FACS analysis. Biological replicates n=3. Data are presented as mean values +/- SEM. Two-sided Student's T-test. ns, not significant ( $P>0.1$ ). Numeric values for  $P<0.1$  are shown. The source data are provided in the Source Data file. The strategy for FACS analysis here is shown in Supplementary Fig. 11.

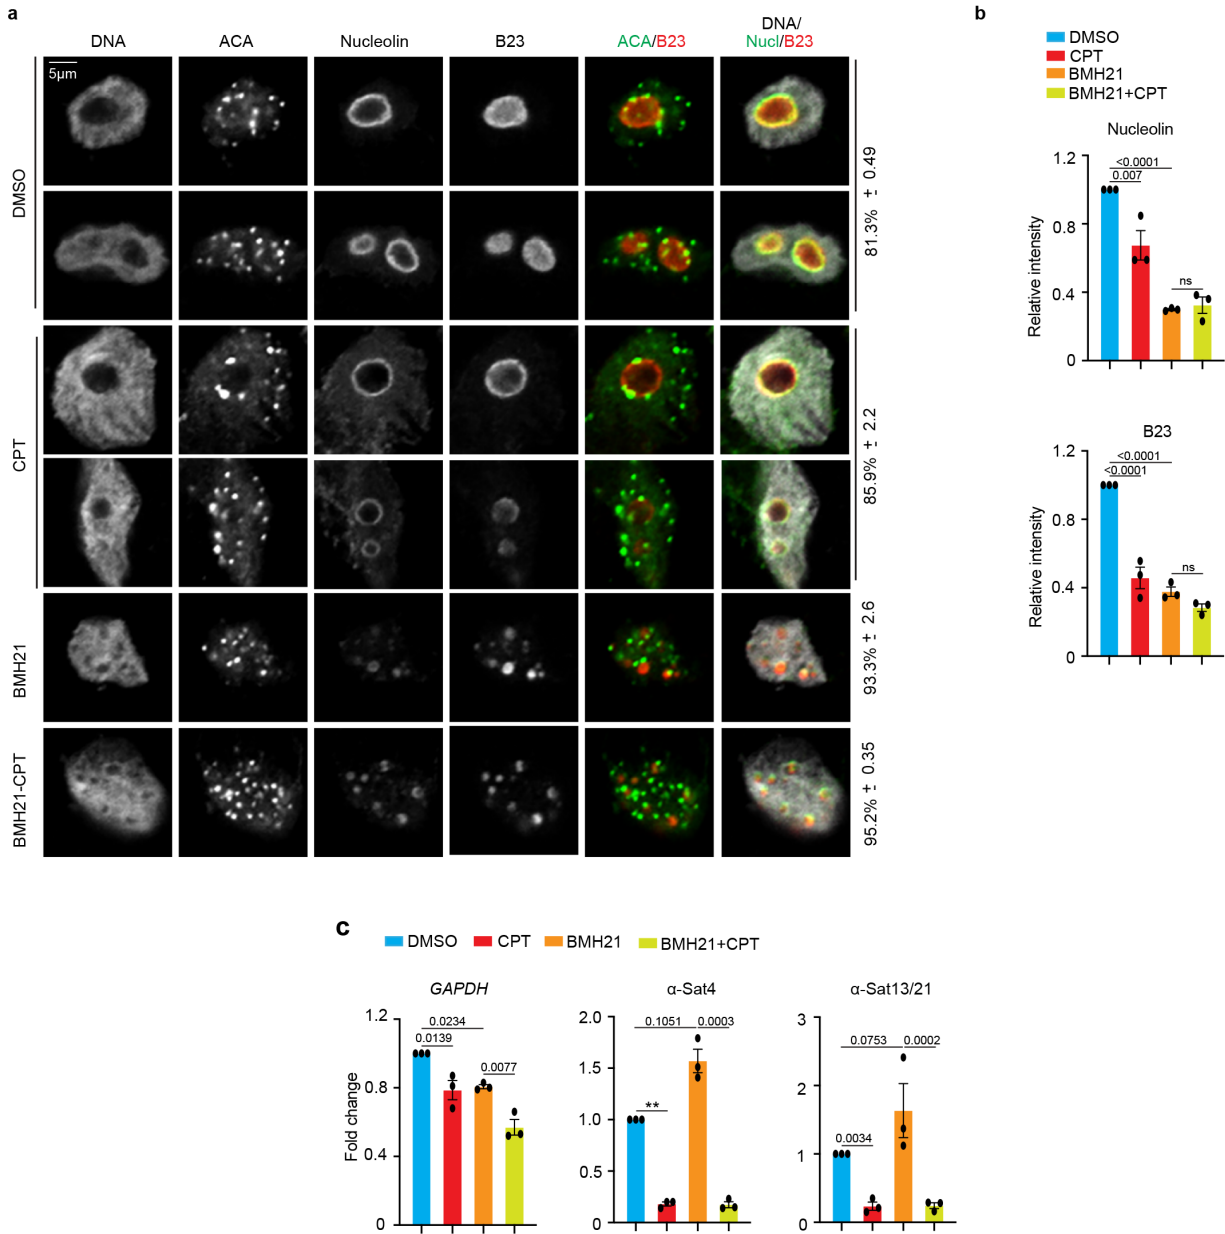

**Supplementary Fig. 4. The nucleolus may not play an important role in Top1-mediated  $\alpha$ -satellite transcription**

**a. RNAP I inhibitor BMH-21 treatment disrupts the nucleolar structure and decreases the levels of nucleolin and B23.** HeLa cells treated with DMSO, CPT (10  $\mu$ M), BMH-21 (RNAPI inhibitor), or BMH-21 plus CPT for 12 hr were stained with DAPI and the indicated antibodies. The percentages in the left panel represent cells with specific nucleolus morphology. Biological replicates n=3. Data are presented as mean values +/- SEM. Representative images are shown here. **b.** Relative intensities of nucleolar components nucleolin (nucleolin/DNA) and B23

(B23/DNA) in (a) are shown here. Biological replicates n=3. Data are presented as mean values +/- SEM. ANOVA followed by pairwise comparisons with Turkey's test. **c. Top1-regulated  $\alpha$ -satellite transcription is independent of intact nucleolar structures.** HeLa cells treated as described in (a) were collected for real-time PCR analysis. Biological replicates n=3. Data are presented as mean values +/- SEM. ANOVA followed by pairwise comparisons with Turkey's test were applied. ns, not significant ( $P>0.1$ ). Numeric values for  $P<0.1$  are shown. The source data are provided in the Source Data file.



| Primers | DMSO | Etop (Fold change) |         |               |
|---------|------|--------------------|---------|---------------|
| GAPDH   | 1.00 | 0.93               |         |               |
| RPL30   | 1.00 | 0.97               |         |               |
| D1Z5-b  | 1.00 | 2.81               | ← Old   | Centromere 1  |
| D1Z5-c  | 1.00 | 10.74              | ← Old   |               |
| D1Z7    | 1.00 | 71.12              | ← Young |               |
| D2Z1    | 1.00 | 206.58             |         |               |
| D3Z1    | 1.00 | 20.77              |         |               |
| D4Z1    | 1.00 | 162.11             |         |               |
| D5Z1    | 1.00 | 139.47             |         |               |
| D6Z1    | 1.00 | 196.75             |         |               |
| D7Z1    | 1.00 | 63.20              | ← Young | Centromere 7  |
| D7Z2    | 1.00 | 407.75             | ← Old   |               |
| D8Z2    | 1.00 | 24.88              |         |               |
| D9Z4    | 1.00 | 27.50              |         |               |
| D10Z1   | 1.00 | 33.83              |         |               |
| D11Z1   | 1.00 | 261.85             |         |               |
| D12Z3   | 1.00 | 31.82              |         |               |
| D13Z1   | 1.00 | 1.17               |         |               |
| D13Z2   | 1.00 | 99.61              |         |               |
| D13Z3   | 1.00 | 6.11               |         |               |
| D13Z6   | 1.00 | 1.27               |         |               |
| D13Z7   | 1.00 | 18.18              |         |               |
| D13Z8   | 1.00 | 2.72               |         |               |
| D13Z9   | 1.00 | 8.28               |         |               |
| D14Z1   | 1.00 | 36.74              |         |               |
| D14Z2   | 1.00 | 55.56              |         |               |
| D14Z3   | 1.00 | 35.30              |         |               |
| D15Z3   | 1.00 | 22.18              |         |               |
| D16Z2   | 1.00 | 87.87              |         |               |
| D17Z1   | 1.00 | 128.83             | ← Young | Centromere 17 |
| D17Z1-b | 1.00 | 29.20              | ← Old   |               |
| D18Z1   | 1.00 | 30.23              |         |               |
| D18Z2   | 1.00 | 12.10              |         |               |
| D19Z4   | 1.00 | 1.71               |         |               |
| D19Z5   | 1.00 | 0.55               |         |               |
| D20Z2   | 1.00 | 51.70              |         |               |
| D21Z1   | 1.00 | 1.15               |         |               |
| D22Z4-1 | 1.00 | 95.65              |         |               |
| D22Z4-2 | 1.00 | 2.80               |         |               |
| D22Z5   | 1.00 | 10.83              |         |               |
| DXZ1    | 1.00 | 33.14              |         |               |

**Supplementary Fig. 5. Real-time PCR CT values for different kinds of  $\alpha$ -satellite arrays and etoposide globally induces  $\alpha$ -satellite transcription**

**Real-time PCR analyses of centromere RNAs using primers against distinct types of  $\alpha$ -satellite HORs.**

RNAs extracted from etoposide-treated HeLa cells (30  $\mu$ M, 12 hrs) were subjected to real-time PCR analysis using primers against different types of  $\alpha$ -satellite HORs. Two boxed regions in red are  $\alpha$ -satellite HORs for centromeres 1 and 20. Young and old denote youngest  $\alpha$ -satellite HOR and oldest  $\alpha$ -satellite HOR, as described in<sup>20</sup>.

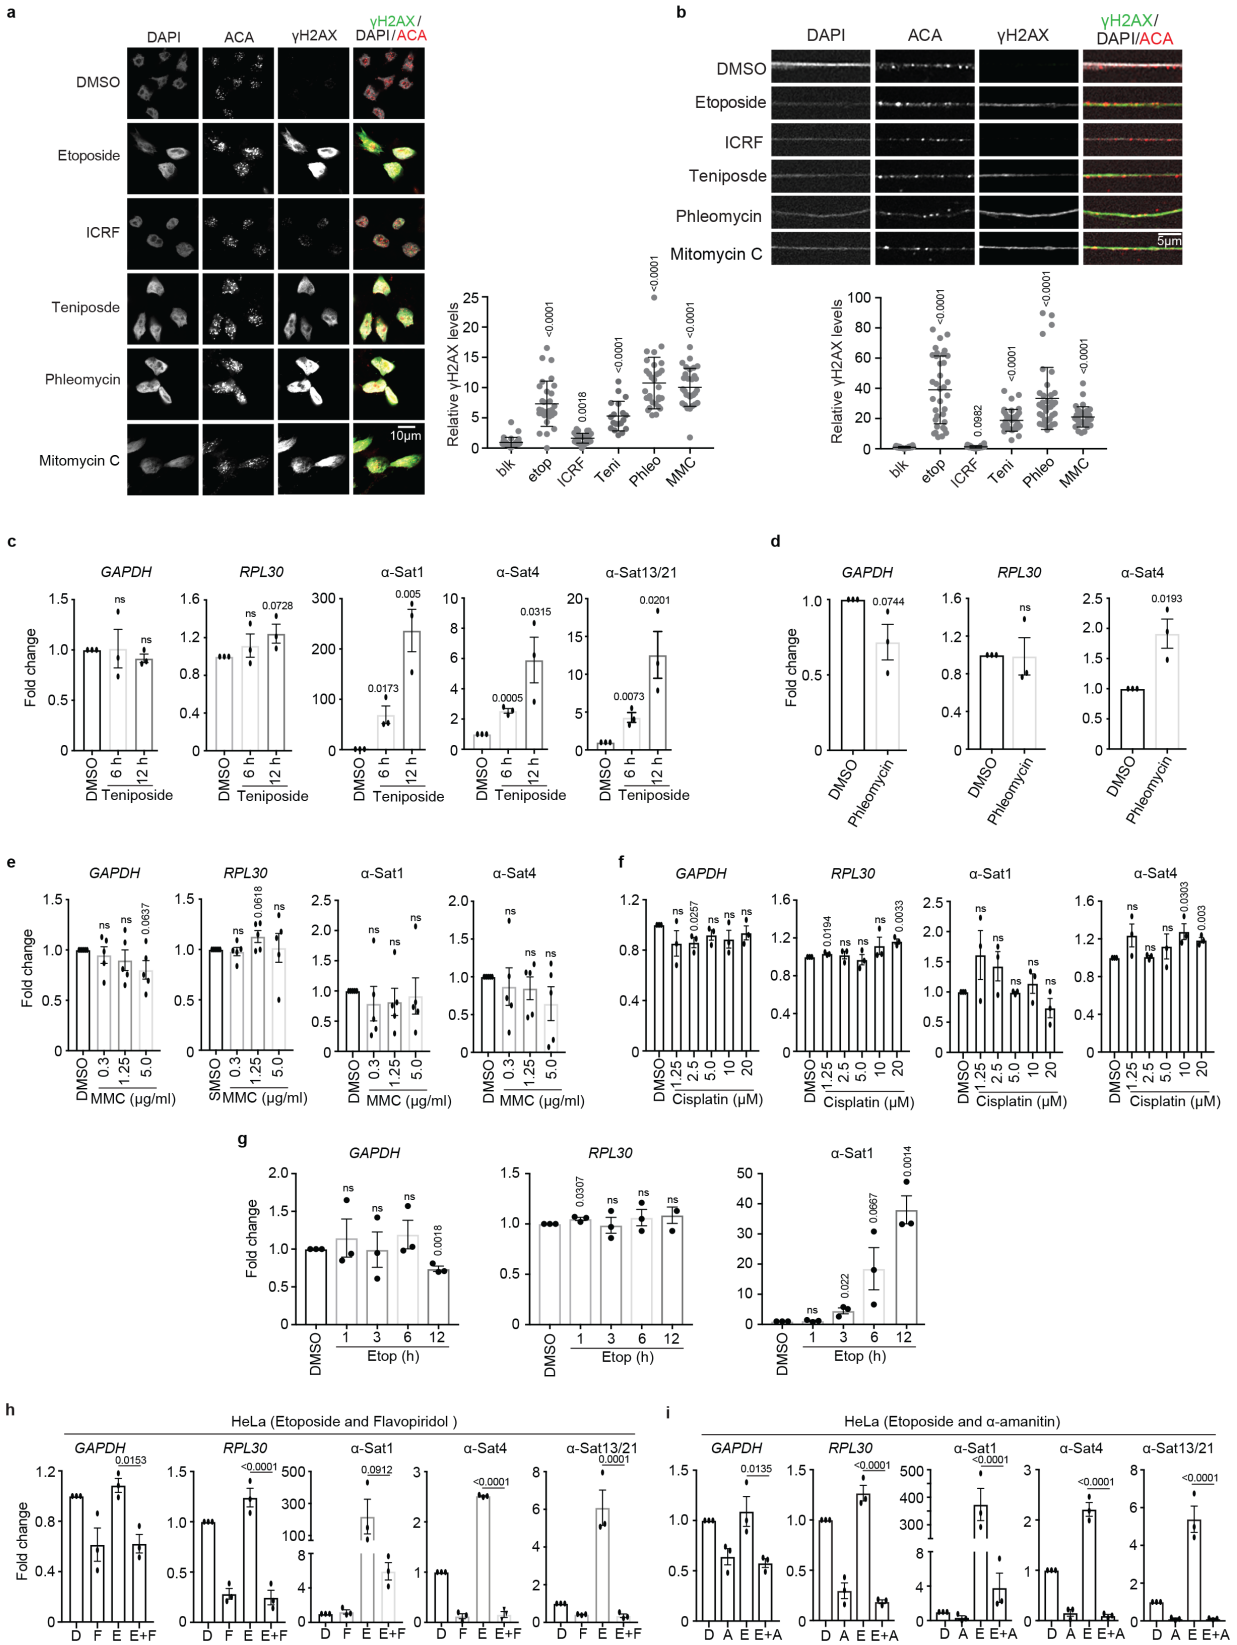

**Supplementary Fig. 6. DSBs dramatically increases  $\alpha$ -satellite transcription**

**a. DNA-damage analyses of HeLa cells with chemical treatments.** HeLa cells were treated with DMSO, etoposide (Etop, 30  $\mu$ M), ICRF (20  $\mu$ M), teniposide (Teni, 2.5  $\mu$ M), phleomycin (phleo, 80  $\mu$ g/ml), or mitomycin C (MMC, 5  $\mu$ g/ml) for 12 hrs, and then subjected to immunostaining. Quantitation of  $\gamma$ H2AX levels ( $\gamma$ H2AX/DNA) was shown in the right panel. Similar results were obtained in two biological replicates and the statistical analysis was carried out based on a single experiment. Each dot represent one cell. n=19 for Teni and n=30 for others. Data are presented as mean values  $\pm$  SD. Two-sided Student's T-test.

**b. DNA-damage analyses of centromeres in HeLa cells with chemical treatments.** HeLa cells treated with DMSO, etoposide (Etop) (12 hrs, 30  $\mu$ M), ICRF (20  $\mu$ M), teniposide (Teni) (12 hrs, 2.5  $\mu$ M), phleomycin (Phleo) (24 hrs, 80  $\mu$ g/ml), or mitomycin C (MMC) (12 hrs, 5  $\mu$ g/ml), were subjected to chromatin stretch followed by immunostaining. Quantitation of  $\gamma$ H2AX levels ( $\gamma$ H2AX/DNA) on centromeric regions was shown in the bottom panel. Similar results were obtained in two biological replicates and the statistical analysis was carried out based on a single experiment. Each dot represents one cell. n=35 for etop, n=34 for MMC and n=36 for others. Data are presented as mean values  $\pm$  SD. Two-sided Student's T-test.

**c, d, e, and f, Effects of various chemicals on  $\alpha$ -satellite transcription.** HeLa cells were treated with DMSO, teniposide (**c**) (12 hrs, 2.5  $\mu$ M), phleomycin (**d**) (24 hrs, 80  $\mu$ g/ml), mitomycin c (MMC, **e**) (12 hrs, indicated concentrations), or cisplatin (**f**) (12 hrs, indicated concentrations), and RNAs were extracted for real-time PCR analysis. Results for  $\alpha$ -Sat13/21 primers are shown in Fig.3d. Biological replicates (n=5 for **e**) and n=3 for others). Data are presented as mean values  $\pm$  SEM. Two-sided Student's T-test.

**g. Etoposide increases  $\alpha$ -satellite transcription in a time-dependent manner.** HeLa cells were treated with DMSO or etoposide (2.5  $\mu$ M) at the different timepoints and RNAs were extracted for real-time PCR analysis. Results from  $\alpha$ -Sat13/21 primers were recorded in Fig.3e. Biological replicates n=3. Data are presented as mean values  $\pm$  SEM. Two-sided Student's T-test.

**h and i. DSB-induced  $\alpha$ -satellite transcription depends on RNAP II.** HeLa cells treated with RNAP II inhibitor  $\alpha$ -amanitin (**i**, 50  $\mu$ g/ml), flavopiridol (**h**, 1  $\mu$ M), etoposide (**h** and **i**, 30  $\mu$ M), flavopiridol plus etoposide (**h**), or  $\alpha$ -amanitin plus etoposide (**i**) for 12 hrs and RNAs were extracted for real-time PCR analysis. Biological replicates n=3. Data are presented as mean values  $\pm$  SEM. ANOVA followed by pairwise comparisons with Turkey's test. ns, not significant ( $P > 0.1$ ). Numeric values for  $P < 0.1$  are shown. The source data are provided in the Source Data file.

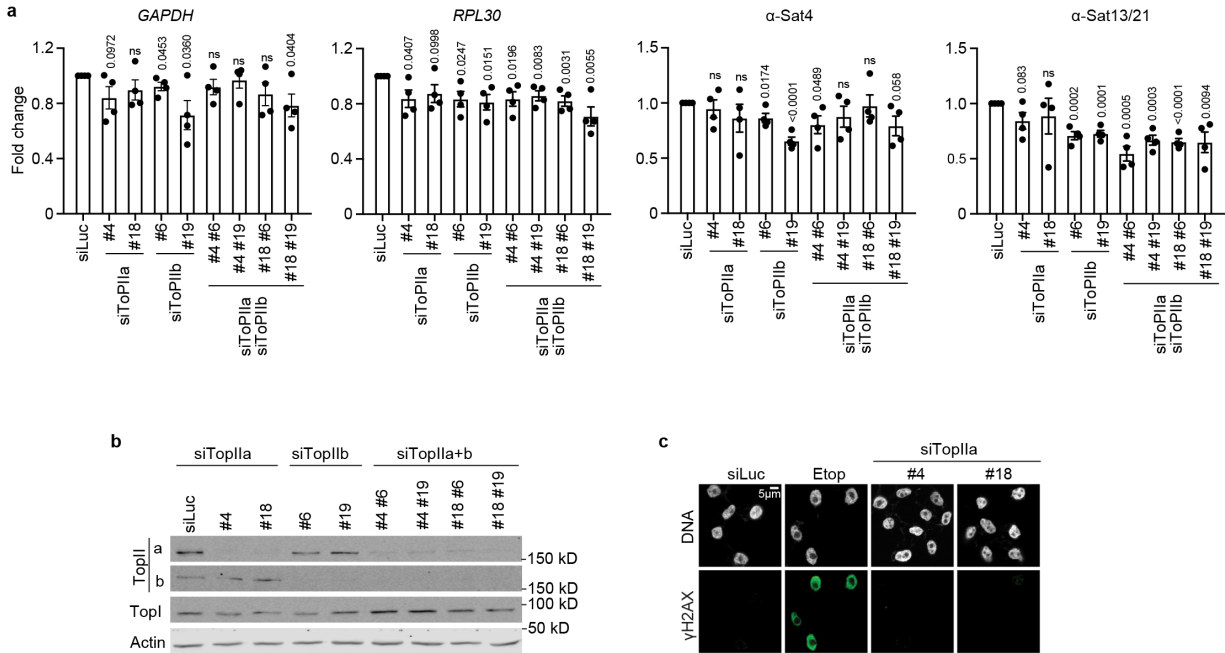

## Supplementary Fig. 7. TopII knockdown by siRNAs does not affect $\alpha$ -satellite transcription

**a. TopII knockdown barely changes  $\alpha$ -satellite transcription.** RNAs from HeLa cells transfected with the indicated siRNAs were subjected to real-time PCR analysis. The statistical analysis was carried out based on various independent biological replicates (n=4). Data are presented as mean values +/- SEM. Two-sided Student's T-test. **b. Protein levels of TopII in TopII knockdown cells.** Lysates of HeLa cells in (a) were subjected to Western-blotting analysis. **c. TopII knockdown does not significantly induce DNA damage.** HeLa cells were transfected with the indicated siRNAs and then subjected to immunostaining with the indicated antibodies. ns, not significant (P>0.1). Numeric values for P<0.1 are shown. The source data are provided in the Source Data file.

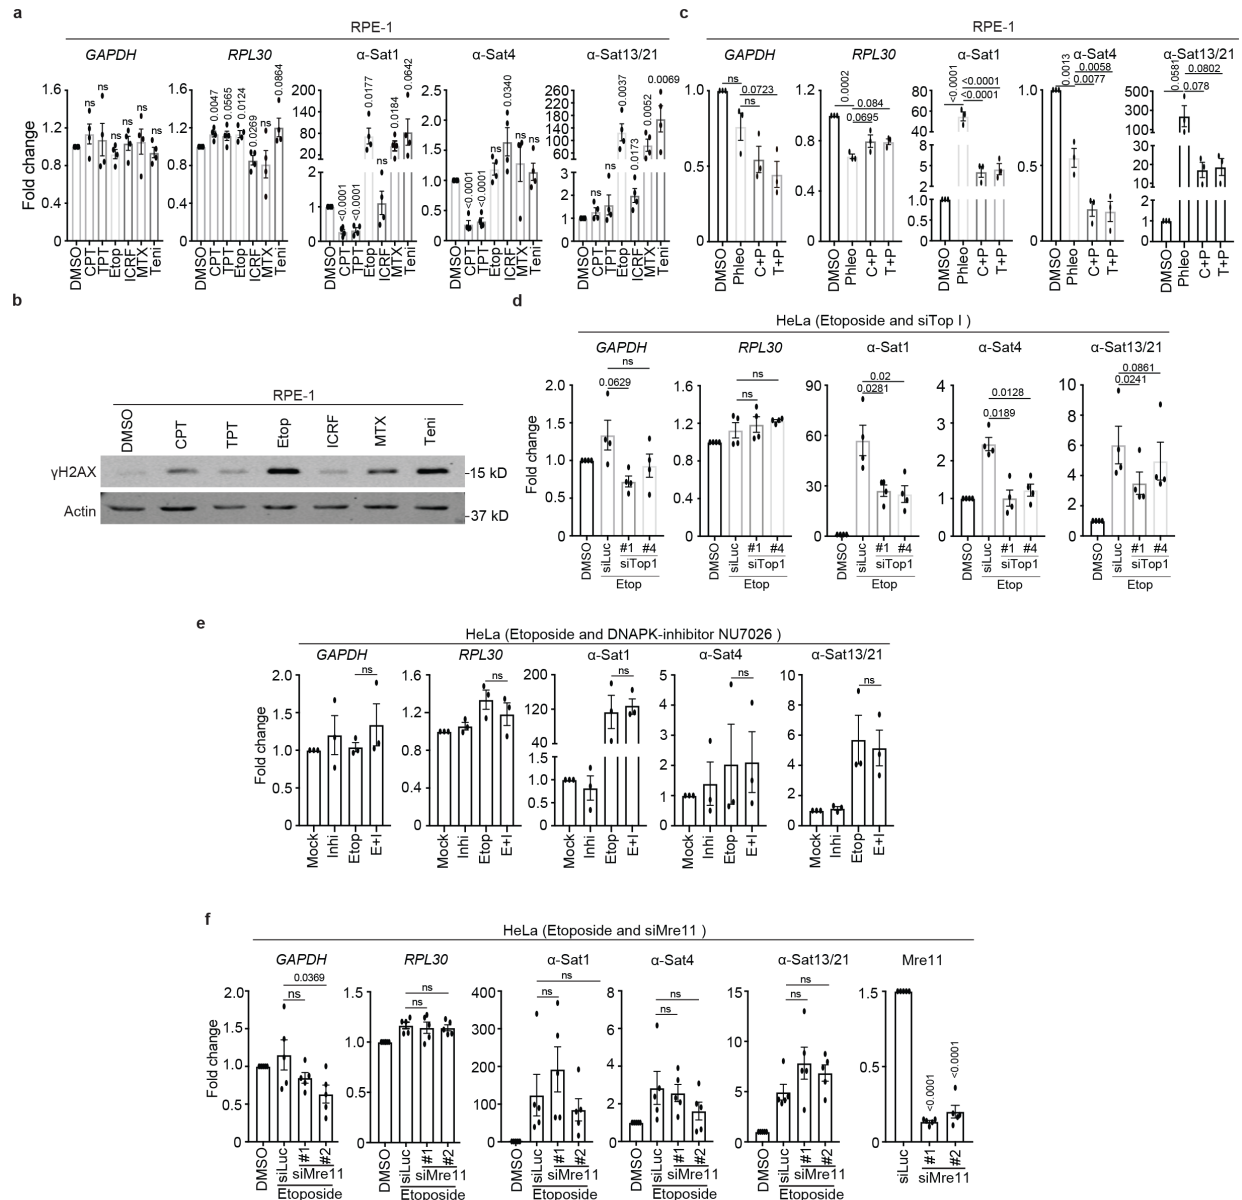

## Supplementary Fig. 8. Top1 regulates DSB-increased $\alpha$ -satellite transcription

**a. DSB increases  $\alpha$ -satellite transcription in RPE-1 cells.** RNAs from RPE-1 cells treated with CPT (2.5  $\mu$ M), TPT (10  $\mu$ M), etoposide (Etop, 30  $\mu$ M), ICRF (20  $\mu$ M), methotrexate (MTX, 2.0  $\mu$ M), or teniposide (Teni, 2.5  $\mu$ M) for 12 hrs were subjected to real-time PCR analysis. The statistical analysis was carried out based on various independent biological replicates (n=4). Data are presented as mean values  $\pm$  SEM. Two-sided Student's T-test . **b.  $\gamma$ H2AX levels in (a).** Lysates of RPE-1 cells in (a) were subjected to SDS-PAGE resolution and then blotted with the indicated antibodies. Similar results were observed in two biological replicates. **c. DSB-**

**induced  $\alpha$ -satellite transcription depends on Top1.** RNAs from RPE-1 cells treated with DMSO, phleomycin (Phleo) (24 hrs, 80  $\mu$ g/ml), CPT (12 hrs, 2.5  $\mu$ M) plus phleomycin (C+P), or TPT (12 hrs, 10  $\mu$ M) plus phleomycin (T+P) were subjected to real-time PCR analysis. The statistical analysis was carried out based on various independent biological replicates (n=3). Data are presented as mean values +/- SEM. ANOVA followed by pairwise comparisons with Turkey's test. **d. Top1 knockdown by siRNAs partially decreases  $\alpha$ -satellite transcription.** HeLa cells transfected with luciferase or Top1 siRNAs were treated with etoposide (Etop, 30  $\mu$ M) for 12 hrs and RNAs were extracted for real-time PCR analysis. The statistical analysis was carried out based on various independent biological repeats (n=4). Data are presented as mean values +/- SEM. Two-sided Student's T-test. **e. DNAPK is dispensable for DSB-induced  $\alpha$ -satellite transcription.** RNAs extracted from HeLa cells treated with DMSO, DNA-PK inhibitor NU7206 (0.8  $\mu$ M), etoposide (Etop, 30  $\mu$ M), etoposide plus NU7206 (E+I) were subjected for real-time PCR analysis. The statistical analysis was carried out based on various independent biological replicates (n=3). Data are presented as mean values +/- SEM. ANOVA followed by pairwise comparisons with Turkey's test. **f. Mre11 is dispensable for DSB-induced  $\alpha$ -satellite transcription by etoposide.** HeLa cells transfected with luciferase or Mre11 (#1 or #2) siRNAs were treated with etoposide (30  $\mu$ M) for 12 hrs. RNAs were extracted for real-time PCR analysis. The statistical analysis was carried out based on various independent biological repeats (n=5). Data are presented as mean values +/- SEM. ANOVA followed by pairwise comparisons with Turkey's test. ns, not significant (P>0.1). Numeric values for P<0.1 are shown. The source data are provided in the Source Data file.

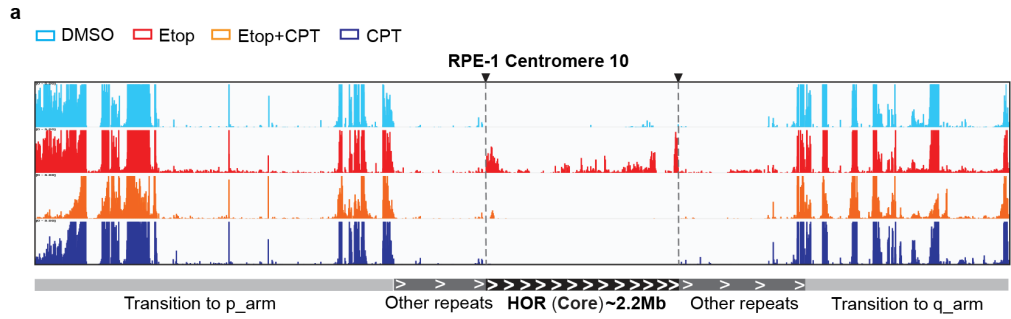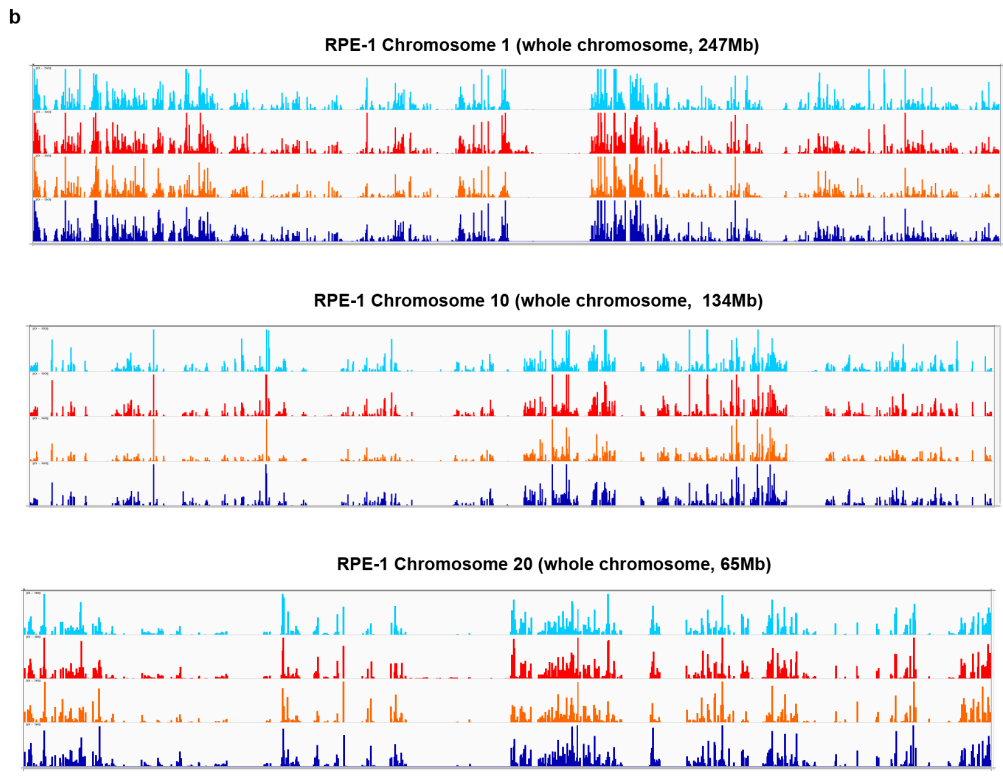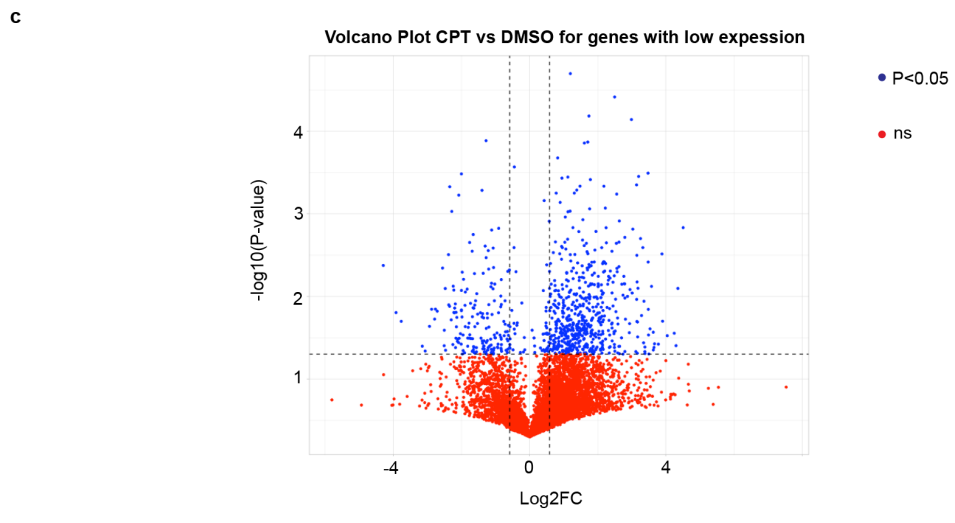

**Supplementary Fig. 9. RNA-seq analyses of HeLa cells with treatments of various chemicals**

RPE-1 cells were treated with DMSO, CPT (2.5  $\mu$ M), Etoposide (Etop, 30  $\mu$ M), or etoposide plus CPT for 12 hrs and total RNAs were extracted for RNA-Seq analysis. Technical details were recorded in the section of Methods. **a. RNA-seq analysis of  $\alpha$ -SatRNAs for centromere 10.** Results for centromeres 1 and 20 were recorded Fig. 4f. **b. CPT treatment does not significantly change gene expression profile.** RNA-seq analyses were performed for gene expression profile on chromosomes 1, 10 and 20. **c. Analysis of changes in the expression of lowly transcribed genes between CPT and DMSO treatments.** RNA-seq analyses were performed to examine the transcriptional change for lowly transcribed genes after CPT treatment. Details are recorded in the section of Methods.



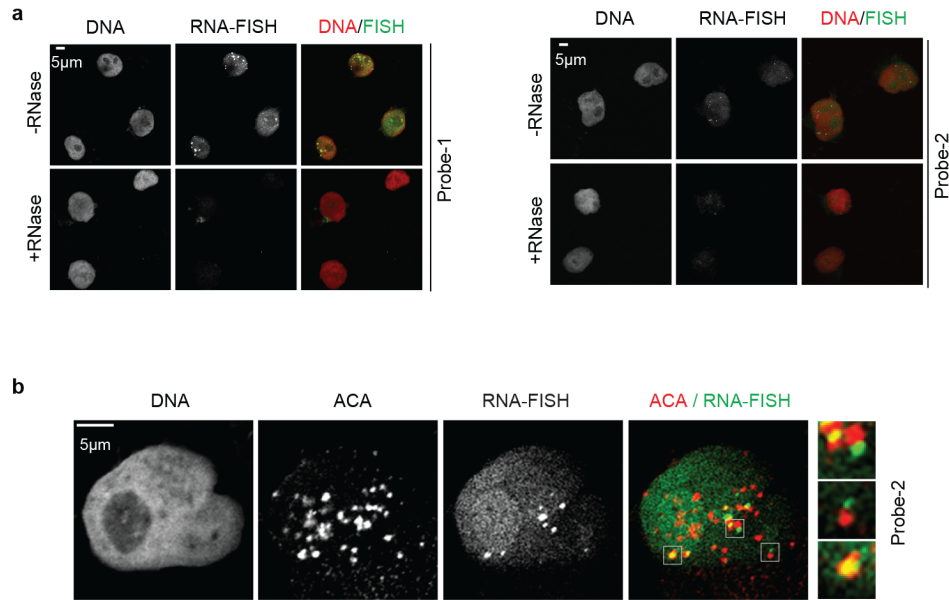

**Supplementary Fig. 10.  $\alpha$ -satRNA-FISH analyses of HeLa cells with various treatments**

**a.  $\alpha$ -satRNA-FISH fluorescence signals are sensitive to RNase treatment.** Etoposide-treated (30  $\mu$ M, 12 hrs) HeLa cells were incubated with RNase before being subjected to hybridization with fluorescence-labelled probe-1 (left) and probe-2 (right).

**b. DSB-induced  $\alpha$ -satRNA-FISH foci do not always localize to centromeres.** Etoposide-treated (30  $\mu$ M, 12 hrs) HeLa cells were hybridized with probe-2 and stained with ACA. Selected regions were amplified and placed in the right panel.

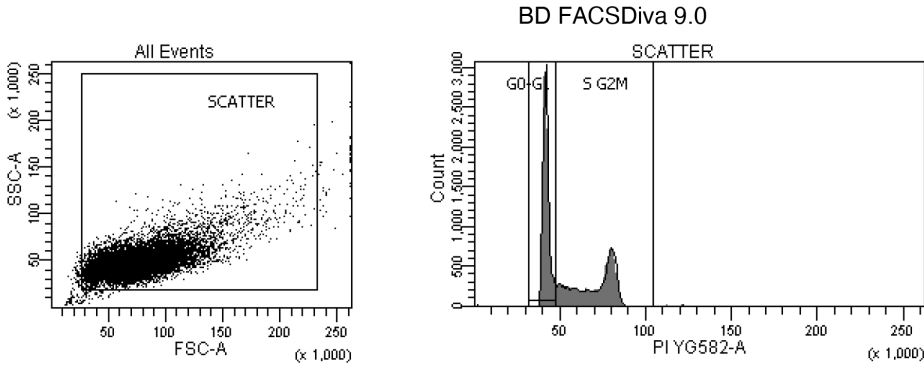

| Experiment Name: | 07282022 LY CELL CYCLE_Hela-RPE1 |         |            |
|------------------|----------------------------------|---------|------------|
| Specimen Name:   | Hela-3rd                         |         |            |
| Tube Name:       | MOCK                             |         |            |
| Record Date:     | Jul 28, 2022 1:21:39 PM          |         |            |
|                  |                                  |         | PI YG582-A |
| Population       | #Events                          | %Parent | Median     |
| ■ G0-G1          | 12,061                           | 49.2    | 40,459     |
| ■ S G2M          | 11,672                           | 47.6    | 72,742     |

  

| Tube: MOCK   |         |         |        |
|--------------|---------|---------|--------|
| Population   | #Events | %Parent | %Total |
| ■ All Events | 25,000  | ####    | 100.0  |
| ■ SCATTER    | 24,504  | 98.0    | 98.0   |
| ■ G0-G1      | 12,061  | 49.2    | 48.2   |
| ■ S G2M      | 11,672  | 47.6    | 46.7   |

### Supplementary Fig. 11. Gating strategy for FACS analysis

In FACS analysis in Supplementary Fig. 3, a gate was applied to include as many cells as possible. Further gates were applied to define G1 cells, S cells, G2 cells, cell debris, and cell aggregates. Distributions of these cell populations were revealed by color-shaded areas in each sample (supplementary Fig. 3). Percentages of G1 cells, S cells and G2 cells were calculated based on the color-shaded areas.
